# Supplementary material for: Influence of Androgen Receptor on the Prognosis of Breast Cancer
Source: PubMed Central journal article supplement (PMC7230528; doi:10.3390/jcm9041083), 2020-04-10
Supplement: jcm-09-01083-s001.pdf [file jcm-09-01083-s001.pdf]

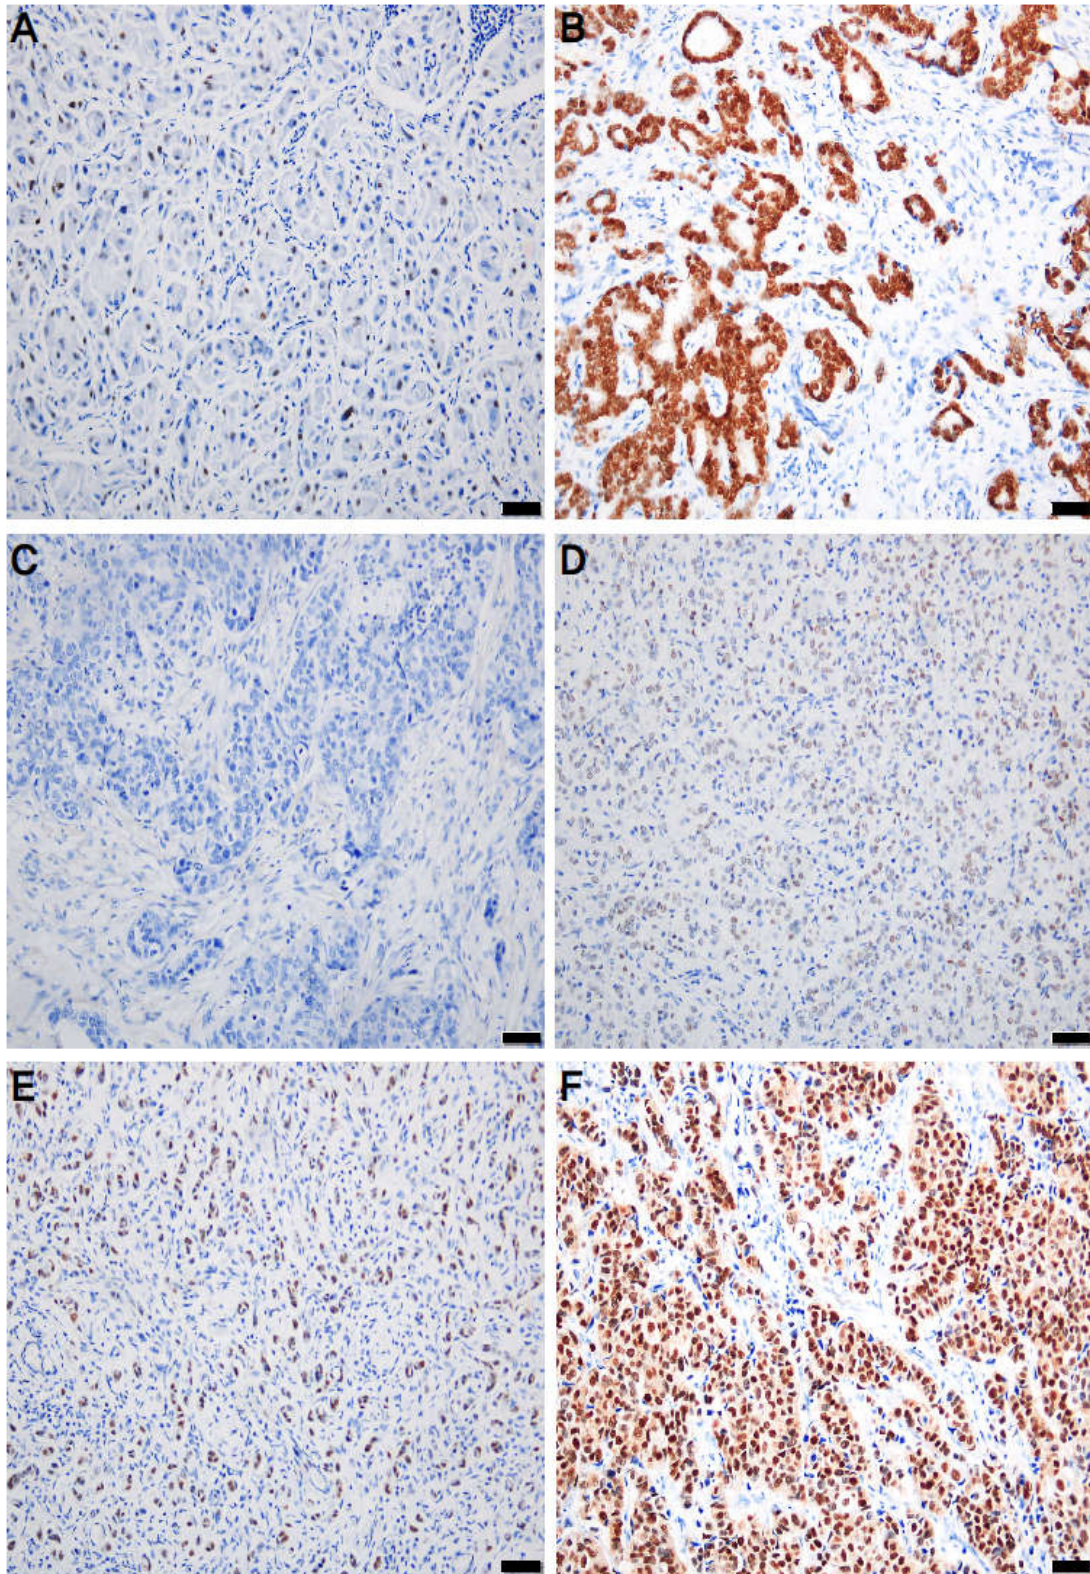

**Figure S1.** Immunohistochemical staining results of AR. Proportion score of less than 10% (A), and more than 10% (B). Intensity score of 0 (C), 1 (D), 2 (E), and 3 (F). Scale bar (bottom right), 50  $\mu$ m. Abbreviation: AR, androgen receptor.

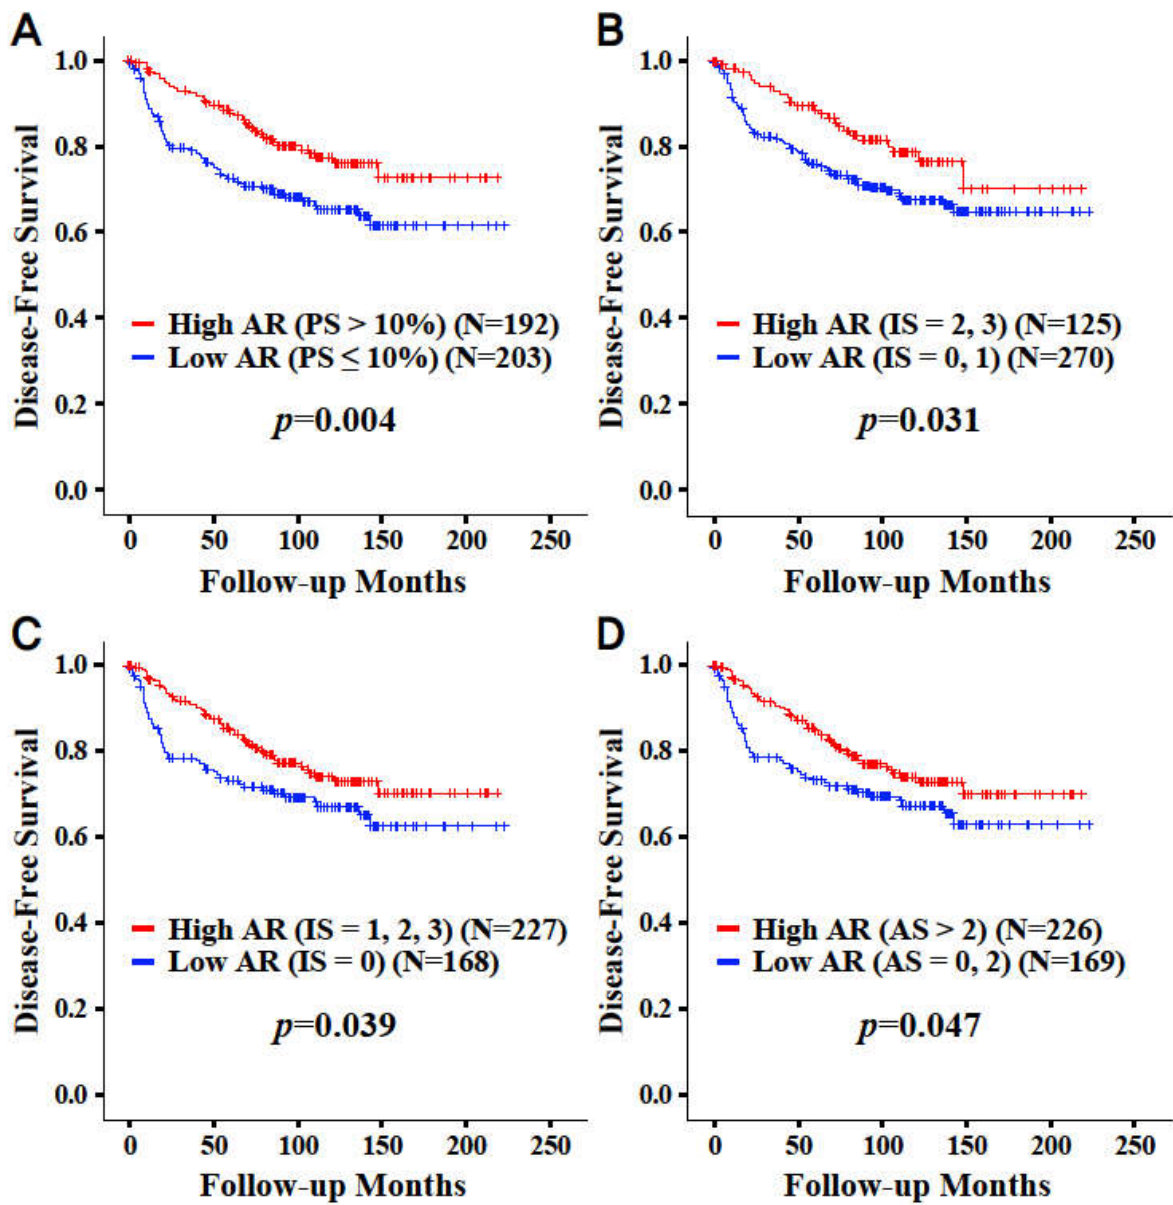

**Figure S2.** Disease-free survival curves according to expression level of AR by immunohistochemistry. Curves according to propensity score with the cut-off value of 10% (A), intensity score of 0, 1 vs. 2, 3 (B), intensity score of 0 vs. 1, 2, 3 (C), and Allred score of 0, 2 vs. more than 2 (D). Abbreviation: AR, androgen receptor; AS, Allred score, IS, intensity score; PS, proportion score.



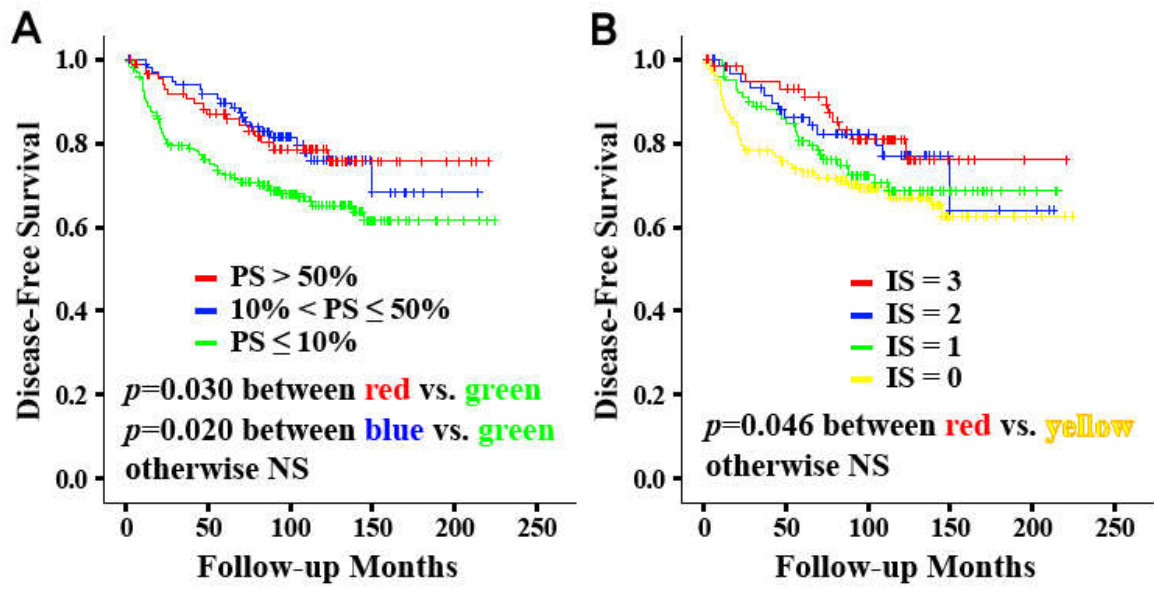

**Figure S3.** Disease-free survival curves according to expression level of AR by immunohistochemistry. Curves according to proportion score (A) and intensity score (B). Abbreviation: AR, androgen receptor; IS, intensity score; NS, not significant; PS, proportion score.

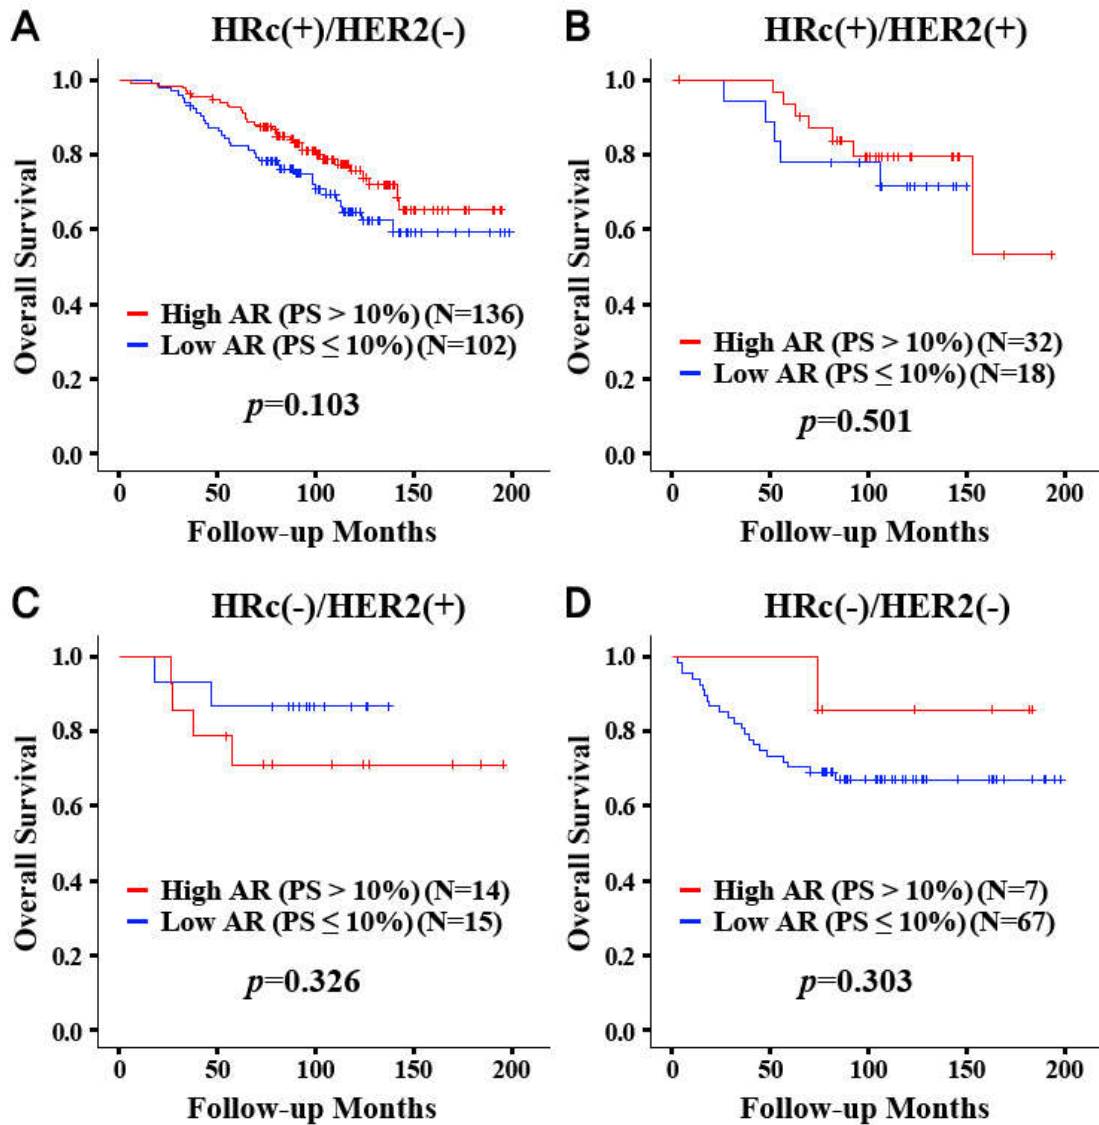

**Figure S4.** Overall survival curves according to proportion score with the cut-off value of 10% by immunohistochemistry regarding AR. Curves in the subtype of HRc(+)/HER2(-) (A), HRc(+)/HER2(+) (B), HRc(-)/HER2(+) (C), and HRc(-)/HER2(-) (D), respectively. Abbreviation: AR, androgen receptor; HER2, human epidermal growth factor receptor 2; HRc, hormone receptor; PS, proportion score.

**Table S1.** Detailed overall survival rates and disease-free survival rates according to expression level of AR (proportion score with the cut-off value of 10%).

| <b>Overall Survival</b>      |                   |                               |             |                   |                               |             |                   |                               |             |
|------------------------------|-------------------|-------------------------------|-------------|-------------------|-------------------------------|-------------|-------------------|-------------------------------|-------------|
| <b>Follow up time (year)</b> | <b>Low AR</b>     |                               |             | <b>High AR</b>    |                               |             | <b>Total</b>      |                               |             |
|                              | <b>Subject No</b> | <b>Event No <sup>a)</sup></b> | <b>Rate</b> | <b>Subject No</b> | <b>Event No <sup>a)</sup></b> | <b>Rate</b> | <b>Subject No</b> | <b>Event No <sup>a)</sup></b> | <b>Rate</b> |
| 5                            | 203               | 36                            | 82.20%      | 192               | 10                            | 94.80%      | 395               | 46                            | 88.30%      |
| 10                           | 165               | 56                            | 71.30%      | 178               | 35                            | 80.30%      | 344               | 91                            | 75.70%      |
| 15                           | 97                | 63                            | 63.90%      | 100               | 43                            | 69.40%      | 198               | 106                           | 66.60%      |
| Last follow-up               | 19                | 63                            | 63.90%      | 22                | 44                            | 66.30%      | 42                | 107                           | 65.00%      |
| Last follow-up months        | 239 months        |                               |             | 235 months        |                               |             | 239 months        |                               |             |
| <b>Disease-Free Survival</b> |                   |                               |             |                   |                               |             |                   |                               |             |
| <b>Follow up time (year)</b> | <b>Low AR</b>     |                               |             | <b>High AR</b>    |                               |             | <b>Total</b>      |                               |             |
|                              | <b>Subject No</b> | <b>Event No <sup>a)</sup></b> | <b>Rate</b> | <b>Subject No</b> | <b>Event No <sup>a)</sup></b> | <b>Rate</b> | <b>Subject No</b> | <b>Event No <sup>a)</sup></b> | <b>Rate</b> |
| 5                            | 203               | 53                            | 72.50%      | 192               | 22                            | 87.90%      | 395               | 75                            | 80.00%      |
| 10                           | 127               | 63                            | 65.40%      | 145               | 38                            | 76.10%      | 273               | 101                           | 70.60%      |
| 15                           | 53                | 65                            | 61.70%      | 48                | 39                            | 72.70%      | 102               | 104                           | 67.00%      |
| Last follow-up               | 6                 | 65                            | 61.70%      | 8                 | 39                            | 72.70%      | 15                | 104                           | 67.00%      |
| Last follow-up months        | 216 months        |                               |             | 212 months        |                               |             | 216 months        |                               |             |

Abbreviation: AR, androgen receptor. <sup>a)</sup> Cumulative number of events.
